# Supplementary material
Source: PubMed Central journal article supplement (PMC2721793)
Supplement: NIHMS102620-supplement-1.pdf [file NIHMS102620-supplement-1.pdf]

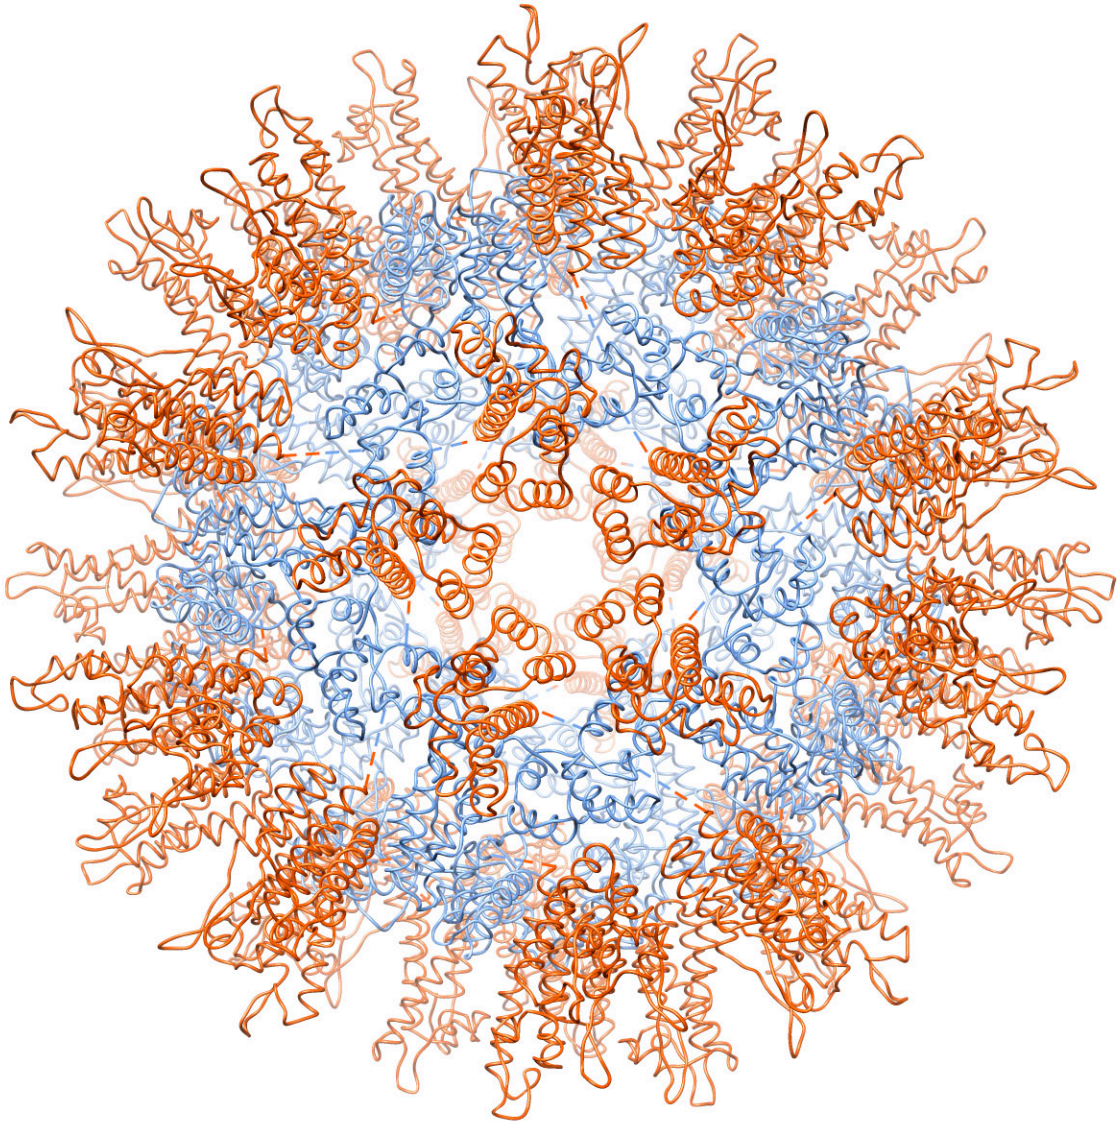

**Supplementary Figure 1.** Pseudo-atomic model of the T=1 capsid. The NTDs are represented in orange, and the CTDs are in blue.

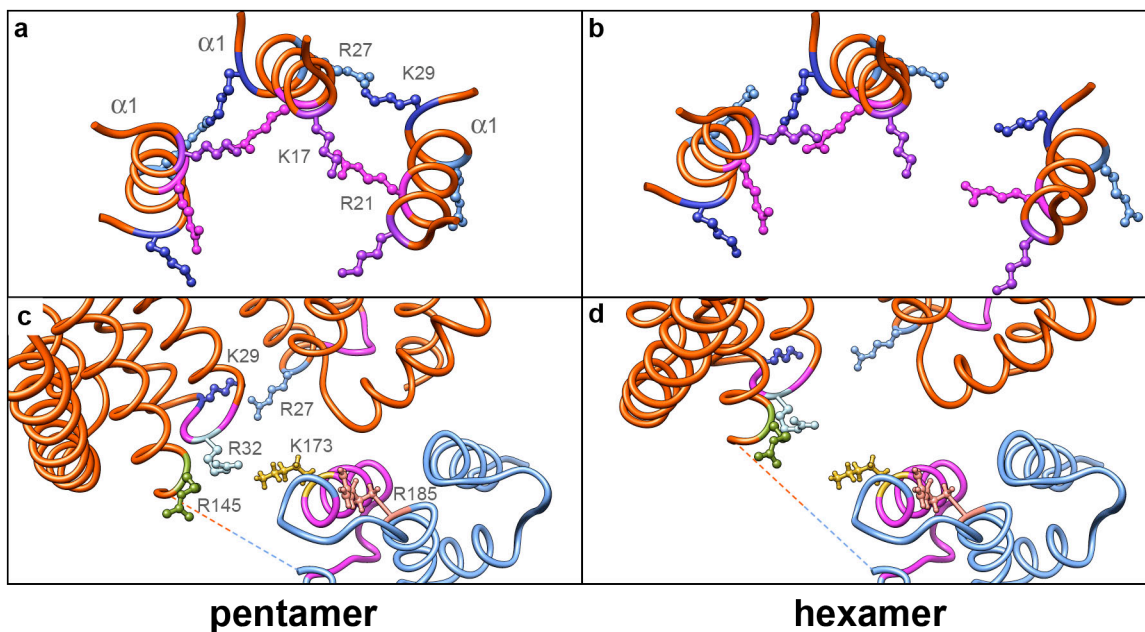

**Supplementary Figure 2.** Charged residues and inter-subunit interactions. Basic residues located close to the NTD-NTD and NTD-CTD interfaces are shown in a ball-and-stick fashion. The side-chain dispositions have not been determined; the diagram is intended to illustrate the relative proximity of like charges. NTD-NTD interfaces for pentamers and hexamers are shown in **a** and **b**, respectively. NTD-CTD interfaces for pentamers and hexamers are shown in **c** and **d**, respectively. The interfaces shown in **a** and **c** are from the T=1 capsid model, and those shown in **b** and **d** from the T=3 capsid model. The NTD-CTD interface in **d** is from the interaction of H1-NTD against H2-CTD. The NTDs are represented in orange, and the CTDs are in blue. In **c** and **d**, the loop between helices 1 and 2, in the NTDs, and the major homology region, in the CTD, are highlighted in magenta.

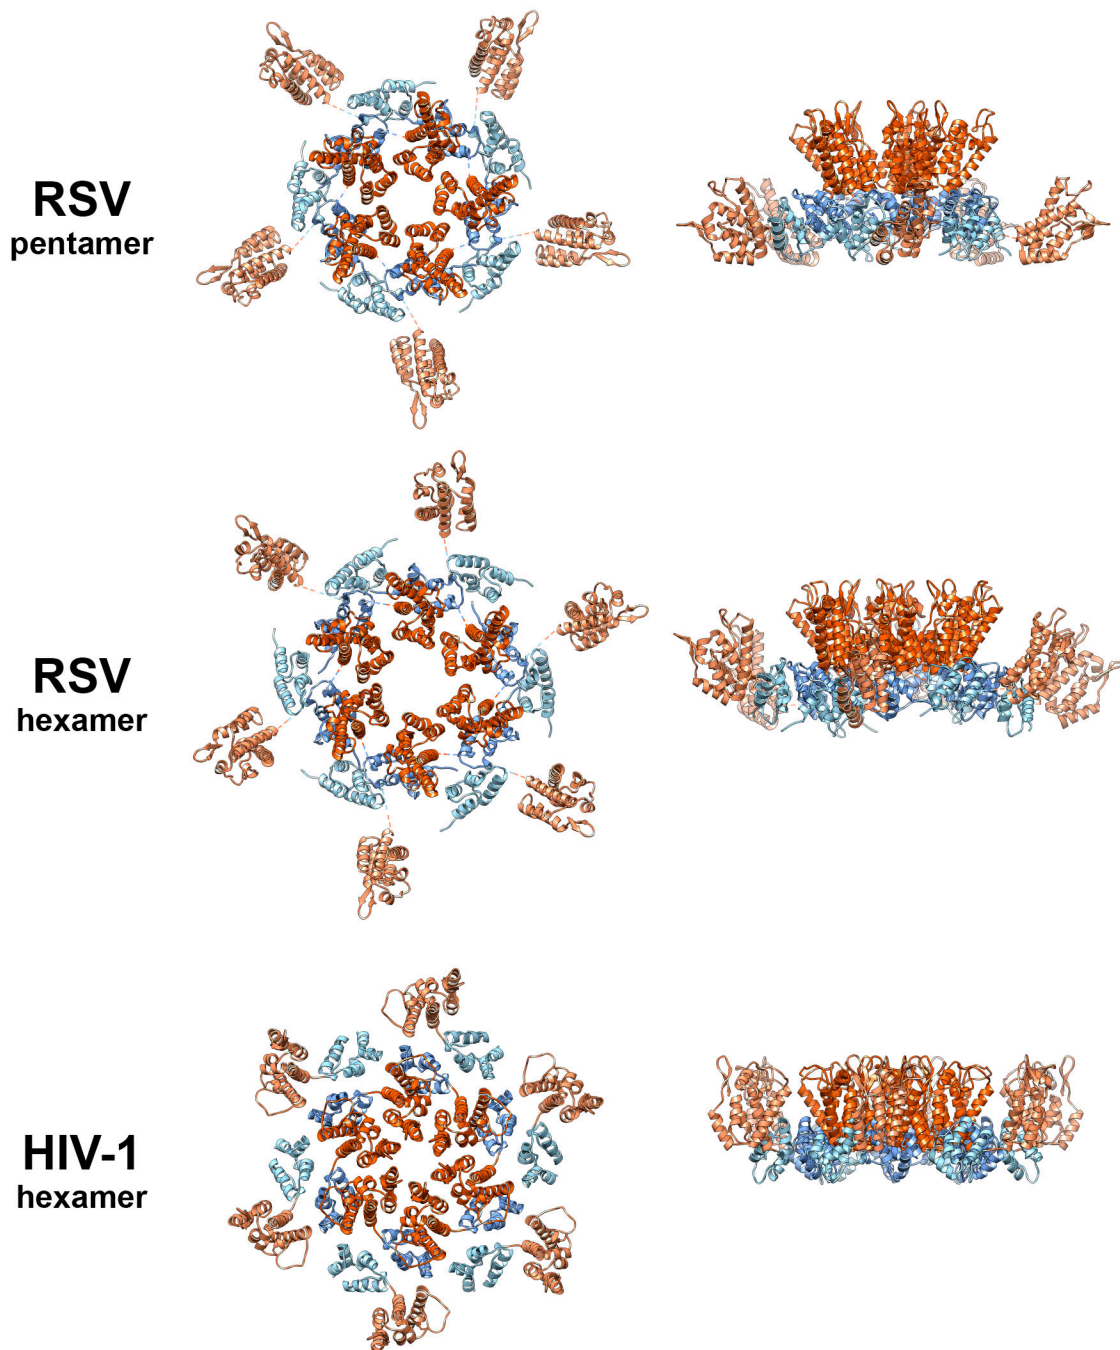

**Supplementary Figure 3.** Top (left) and side (right) views of pentamer and hexamer of RSV CA and hexamer of HIV-1 CA. In each case, all the subunits in a given ring are shown, plus 5 or 6 subunits from surrounding rings. The NTDs are represented in orange, and the CTDs are in blue.

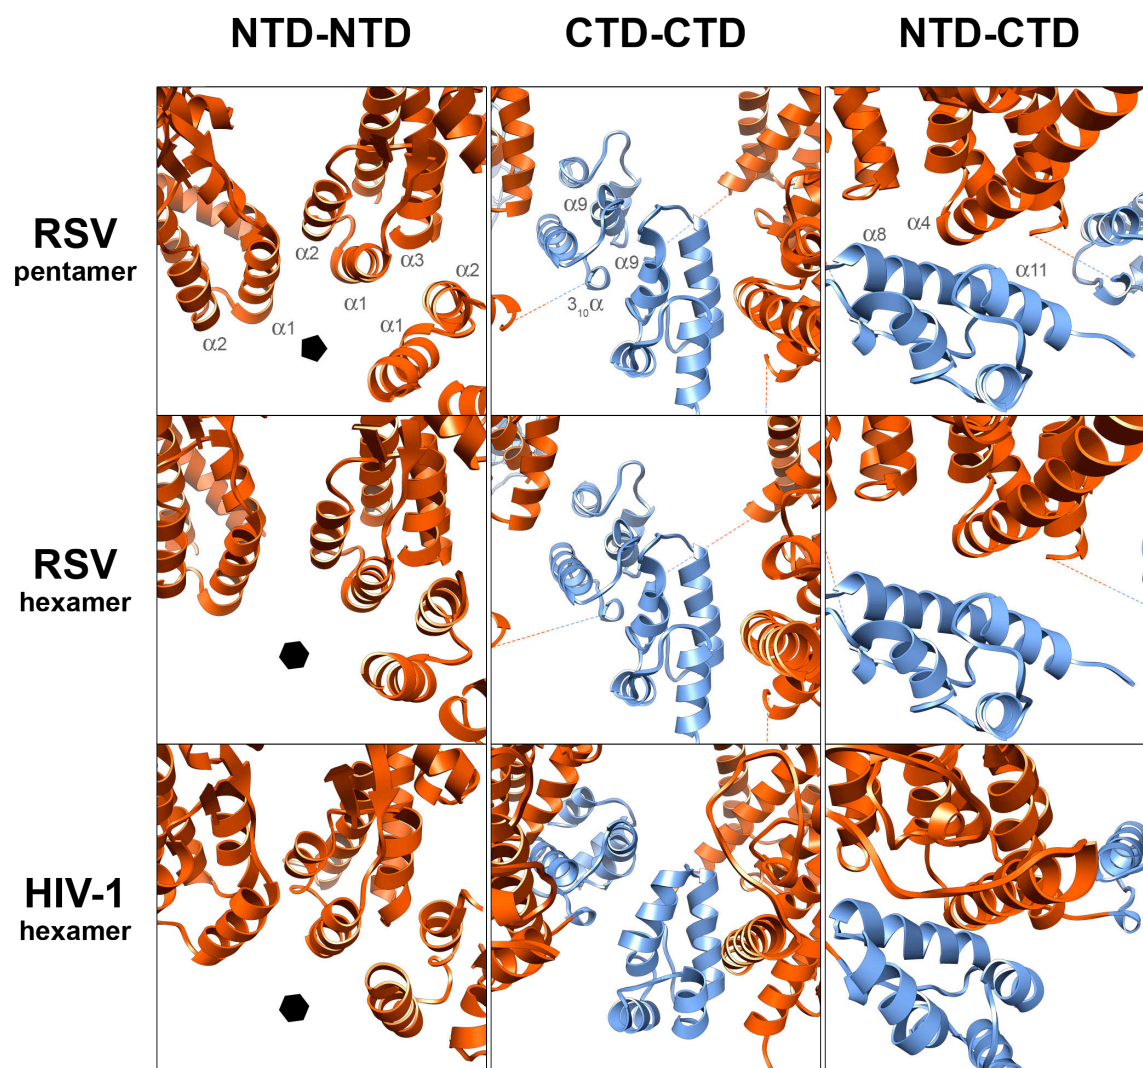

**Supplementary Figure 4a.** Comparison of the three inter-subunit interactions as observed in pentamers and hexamers of RSV CA and hexamers of HIV-1 CA. The CTD-CTD interface shown for the RSV CA hexamer is from the interaction between H2-CTD and H2-CTD. The NTD-CTD interface shown for the RSV CA hexamer is from the interaction between H1-NTD and H2-CTD. NTDs are represented in orange and CTDs are in blue.

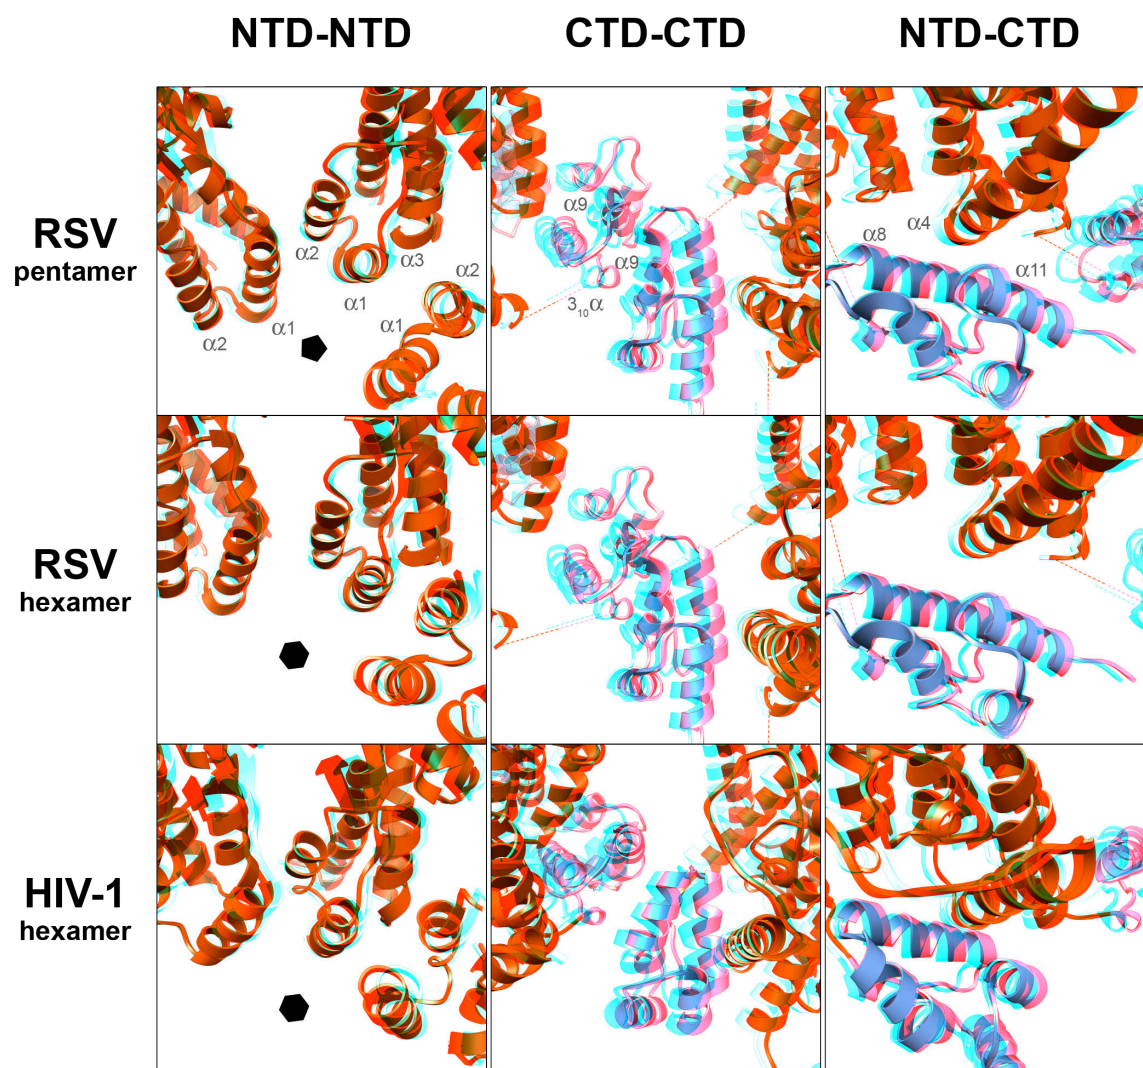

Supplementary Figure 4b. Anaglyph stereo view of Figure 4a.

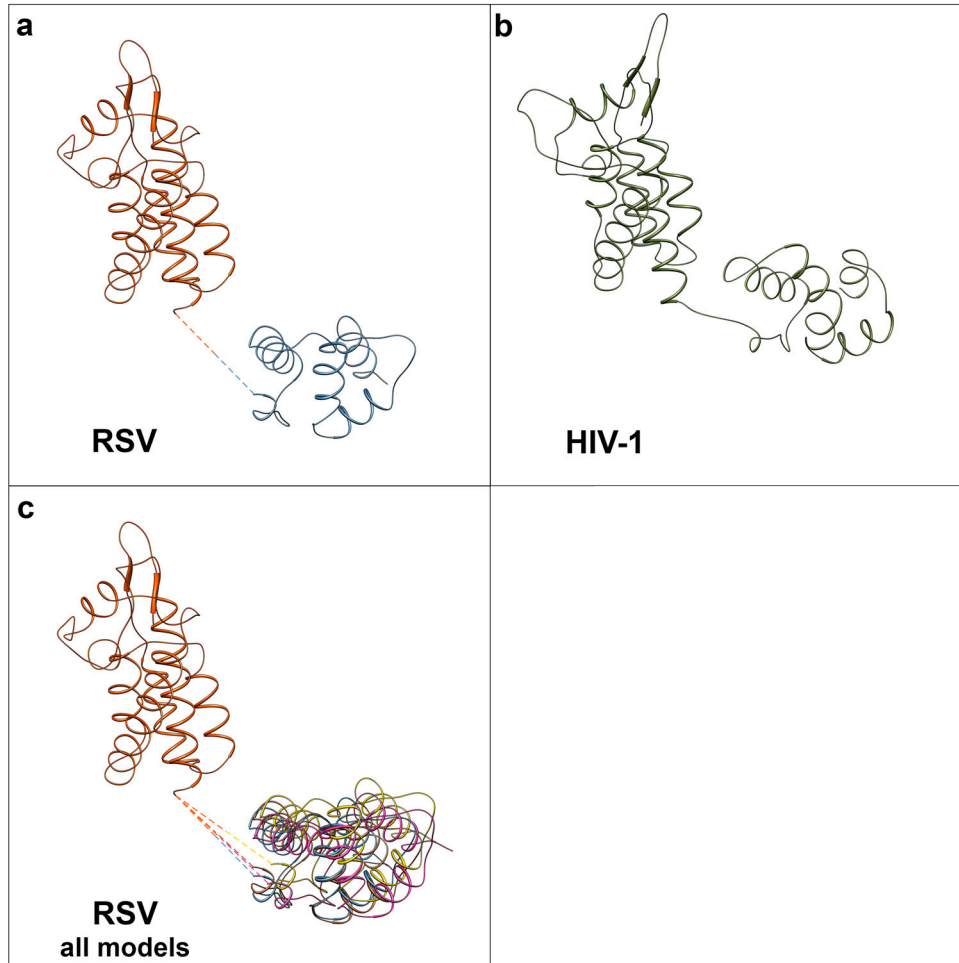

**Supplementary Figure 5.** Flexibility of RSV CA allowed by the inter-domain linker.

**a**, Pseudo-atomic model of RSV CA derived from the 17-nm T=1 particle. **b**, Pseudo-atomic model of HIV-1 CA derived from a published analysis of hexameric lattices (Ganser-Pornillos et al., Cell, 2007). **c**, Overlap of pseudo-atomic models of RSV CA for all non-equivalent positions in the T=1 and T=3 capsids. The NTDs are fixed and the positions of CTDs vary. The models of RSV CA and HIV-1 CA (a, b) are aligned to show the same orientation.
